# Supplementary material
Source: Springer Nature journal article supplement (https://www.springermedizin.de/resource/supplementary/12885_2012_3530_MOESM3_ESM.pdf/9463586)

# Age X Marital Status Effect in Practical Problems

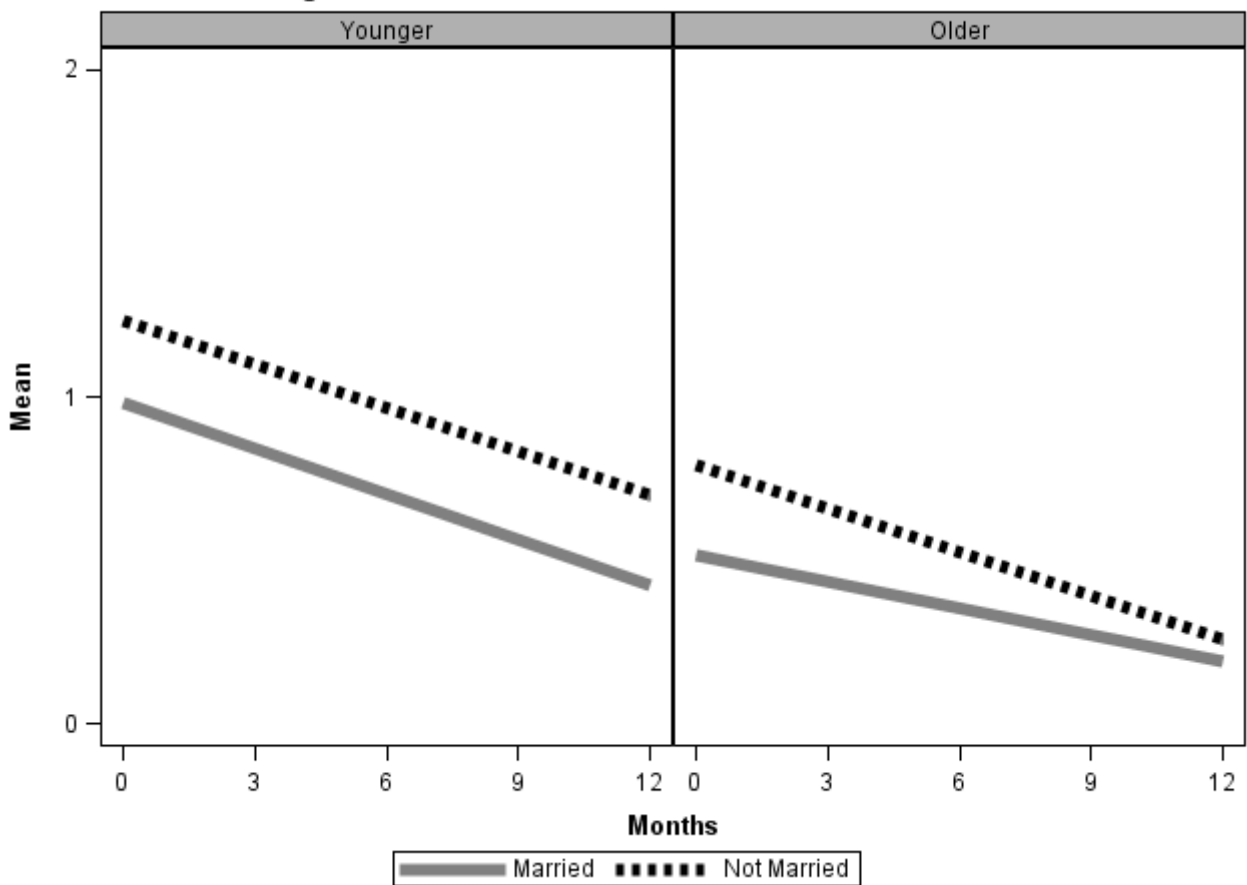

Supplement: MOESM3 [file 9463586]
